# Supplementary material for: Understanding Fear after an Anterior Cruciate Ligament Injury: A Qualitative Thematic Analysis Using the Common-Sense Model
Source: MDPI journal article supplement (doi:10.3390/ijerph20042920), 2023-02-07
Supplement: s1 [file s1]

Braun & Clarke 15-point Thematic Analysis Checklist

| Process        | No. | Criteria                                                                                                                                                        | Response                                                                                                                       |
|----------------|-----|-----------------------------------------------------------------------------------------------------------------------------------------------------------------|--------------------------------------------------------------------------------------------------------------------------------|
| Transcription  | 1   | The data have been transcribed to an appropriate level of detail, and the transcripts have been checked against the tapes for 'accuracy'                        | Data was transcribed to a high level of detail, and appropriately checked for accuracy.                                        |
| Coding         | 2   | Each data item has been given equal attention in the coding process                                                                                             | We reviewed all transcripts and gave the data items equal attention in the coding process.                                     |
|                | 3   | Themes have not been generated from a few vivid examples (an anecdotal approach), but instead the coding process has been thorough, inclusive and comprehensive | Themes were generated through the coding process and was inclusive of all quotes generated from the articles and comprehensive |
|                | 4   | All relevant extracts for all each theme have been collated                                                                                                     | Yes.                                                                                                                           |
|                | 5   | Themes have been checked against each other and back to the original data set                                                                                   | Yes.                                                                                                                           |
|                | 6   | Themes are internally coherent, consistent, and distinctive                                                                                                     | Yes.                                                                                                                           |
| Analysis       | 7   | Data have been analysed-interpreted, made sense of- rather than just paraphrased or described                                                                   | Yes, evident from the results.                                                                                                 |
|                | 8   | Analysis and data match each other- the extracts illustrate the analytic claims.                                                                                | The analysis and findings closely match the data set.                                                                          |
|                | 9   | Analysis tells a convincing and well-organised story about the data and topic                                                                                   | Yes.                                                                                                                           |
|                | 10  | A good balance between analytical narrative and illustrative extracts is provided                                                                               | Yes. Illustrations have been used within the results section.                                                                  |
| Overall        | 11  | Enough time has been allocated to complete all phases of the analysis adequately, without rushing a phase or giving it a once-over-lightly                      | Yes.                                                                                                                           |
| Written report | 12  | The assumptions about, and specific approach to, thematic analysis are clearly explicated                                                                       | Yes, stated in the methods section.                                                                                            |
|                | 13  | There is good fit between what you claim you do, and what you show you have done- i.e. described method and reported analysis are consistent                    | Yes.                                                                                                                           |

|  |    |                                                                                                               |      |
|--|----|---------------------------------------------------------------------------------------------------------------|------|
|  | 14 | The language and concepts used in the report are consistent with the epistemological position of the analysis | Yes. |
|  | 15 | The researcher is positioned as <i>active</i> in the research process; themes do not just 'emerge'            | Yes. |

REFERENCE:

1. Braun V, Clarke V. Successful qualitative research: a practical guide for beginners. London: SAGE Publications Ltd; 2013.
