# Supplementary material for: Understanding Fear after an Anterior Cruciate Ligament Injury: A Qualitative Thematic Analysis Using the Common-Sense Model
Source: MDPI journal article supplement (doi:10.3390/ijerph20042920), 2023-02-07
Supplement: s1 [file s1]

## Appendix 2

### Participant injury and sport:

| Participant | Pre-injury Sport(s)                        | Level of Sport*                                | Injury occurrence                | Post-injury Sport(s) & level         | Year(s) of injury | Return to Sport Rating <sup>#</sup> |
|-------------|--------------------------------------------|------------------------------------------------|----------------------------------|--------------------------------------|-------------------|-------------------------------------|
| P1          | Football (Australian rules) and basketball | School                                         | Football competition             | Cricket, amateur club level          | 2016              | 2                                   |
| P2          | Basketball                                 | National/International                         | Basketball competitions          | Basketball, amateur club level       | 2017, 2018        | 2                                   |
| P3          | Football (soccer)                          | Amateur/club                                   | Football training                | Nil                                  | 2016              | 0                                   |
| P4          | Hockey                                     | Amateur/club                                   | Hockey competition               | Hockey at amateur club level         | 2016              | 3                                   |
| P5          | Ultimate Frisbee                           | State                                          | Ultimate Frisbee competition     | Ultimate Frisbee at State level      | 2017              | 3                                   |
| P6          | Netball, skiing                            | Amateur/club                                   | Skiing (first), Netball training | Rowing at amateur club level         | 2011, 2016        | 2                                   |
| P7          | Cricket, mixed netball                     | Amateur/club (cricket), social (mixed netball) | Mixed netball game               | Cricket at amateur/club level (only) | 2017              | 3                                   |
| P8          | Skiing (moguls)                            | National/International                         | Skiing training                  | Casual skiing (non-competitive)      | 2011, 2012        | 3                                   |
| P9          | Netball and basketball                     | State                                          | Netball competition              | Netball – State level (only)         | 2015              | 3                                   |
| P10         | Netball                                    | Amateur/Club                                   | Netball competition              | Nil sport (gym for fitness)          | 2018              | 1                                   |
| P11         | Netball                                    | Amateur/club                                   | Netball competition              | Nil sport (runs, gym for fitness)    | 2015              | 1                                   |
| P12         | Basketball, skiing                         | School, casual                                 | Motorcycle accident              | Nil sport, still skis                | 2008              | 2                                   |
| P13         | Netball                                    | Amateur/club                                   | Netball competition              | Nil sport (gym for fitness)          | 2008              | 1                                   |
| P14         | Football (soccer)                          | Amateur/club                                   | Football competitions            | Nil sport (gym for fitness)          | 2006, 2009, 2013  | 1                                   |

|     |                  |                            |                                 |                                                 |      |   |
|-----|------------------|----------------------------|---------------------------------|-------------------------------------------------|------|---|
| P15 | Skiing           | Casual                     | Skiing holiday                  | Nil sport (gym for fitness)                     | 2019 | 1 |
| P16 | Ultimate Frisbee | National/<br>International | Ultimate Frisbee<br>competition | Ultimate Frisbee at<br>amateur/club level       | 2019 | 2 |
| P17 | Tennis, netball  | School                     | Accident at school              | Nil sport (gym, running for<br>fitness)         | 2006 | 1 |
| P18 | Lacrosse         | Amateur/club               | Lacrosse competition            | Nil sport (bicycle, gym,<br>hiking for fitness) | 2019 | 1 |

\* Level of sport was identified as either: 'social' or 'casual' (non- competitive), 'school' (playing in inter-school competitions), 'amateur/club' (amateur clubs playing in a local league), 'State' (eligible to represent an Australian State such as Victoria or NSW), or 'National/International' (eligible for inclusion in a national level team with opportunities to play internationally).

# Return to previous level of function scoring: 0-3 where 0= no return to any exercise, 1= Return to basic exercise (gym etc.) but no or minimal sport (i.e. non-competitive), 2= Return to sport at a lower competition level, 3= Return to previous level of sport.
