# Supplementary material for: Understanding Fear after an Anterior Cruciate Ligament Injury: A Qualitative Thematic Analysis Using the Common-Sense Model
Source: Int J Environ Res Public Health. 2023 Feb 7;20(4):2920. doi: 10.3390/ijerph20042920 (PMC9957354; doi:10.3390/ijerph20042920)
Supplement: Supplementary file 1 [file ijerph-20-02920-s001.zip]

Archive with 22 entries (22 files):
- File S1-P1 Transcript.pdf
- File S1-P10 Transcript.pdf
- File S1-P11 Transcript.pdf
- File S1-P12 Transcript.pdf
- File S1-P13 Transcript.pdf
- File S1-P14 Transcript.pdf
- File S1-P15 Transcript.pdf
- File S1-P16 Transcript.pdf
- File S1-P17 Transcript.pdf
- File S1-P18 Transcript.pdf
- File S1-P2 Transcript.pdf
- File S1-P3 Transcript.pdf
- File S1-P4 Transcript.pdf
- File S1-P5 Transcript.pdf
- File S1-P6 Transcript.pdf
- File S1-P7 Transcript.pdf
- File S1-P8 Transcript.pdf
- File S1-P9 Transcript.pdf
- File S2 Interview Schedule.pdf
- File S3 Braun & Clarke 15-point Thematic Analysis Checklist.pdf
- File S4 Participant Injury and Sport table.pdf
- File S5 Reflection.pdf
